# Supplementary material for: Giardia lamblia-infected preschoolers present growth delays independent of the assemblage A, B or E
Source: PubMed Central journal article supplement (PMC10443202; doi:10.1590/0074-02760230043), 2023-08-18
Supplement: 1678-8060-mioc-118-e230043-s.pdf [file 1678-8060-mioc-118-e230043-s.pdf]

TABLE  
Demographic and parasitological data of the children followed up in the study

| Sample identification | Gender | Age in months | Diagnosis                                                   | Assemblage | HAZ   | WAZ   | WHZ   |
|-----------------------|--------|---------------|-------------------------------------------------------------|------------|-------|-------|-------|
| 1                     | M      | 36.9          | <i>Ascaris lumbricoides</i>                                 |            | -0.66 | 0.29  | 0.89  |
| 2                     | F      | 22.1          | Negative                                                    |            | No    | -0.78 | -1.46 |
| 3                     | F      | 32.0          | Negative                                                    |            | -0.62 | -0.07 | 0.38  |
| 4                     | F      | 20.7          | Negative                                                    |            | No    | -1.18 | -1.37 |
| 5                     | F      | 42.2          | <i>Giardia lamblia</i>                                      | A          | -1.84 | -2.62 | -2.07 |
| 6                     | F      | 12.7          | Negative                                                    |            | No    | -1.13 | No    |
| 7                     | M      | 22.4          | Negative                                                    |            | No    | 1.21  | 0.47  |
| 8                     | F      | 51.3          | Negative                                                    |            | 0.41  | 0.32  | 0.24  |
| 9                     | M      | 37.4          | <i>Giardia lamblia</i>                                      | A          | -1.57 | 0.19  | 1.45  |
| 10                    | M      | 33.9          | Negative                                                    |            | 0.10  | -0.10 | -0.28 |
| 11                    | M      | 47.4          | <i>Entamoeba histolytica/dispar/moshkovskii/bangladeshi</i> |            | 0.03  | 0.14  | 0.12  |
| 12                    | M      | 40.9          | <i>Giardia lamblia</i>                                      | A          | -0.26 | 0.52  | 0.87  |
| 13                    | M      | 29.3          | <i>Ascaris lumbricoides</i>                                 |            | 0.94  | -0.13 | -0.97 |
| 14                    | M      | 38.0          | Negative                                                    |            | -0.58 | 0.19  | 0.68  |
| 15                    | M      | 40.5          | Negative                                                    |            | -0.46 | 0.21  | 0.60  |
| 16                    | M      | 37.4          | Negative                                                    |            | -0.75 | 0.23  | 0.87  |
| 17                    | M      | 51.9          | Negative                                                    |            | -0.10 | 0.54  | 0.86  |
| 18                    | M      | 44.3          | <i>Giardia lamblia</i>                                      | E          | -0.76 | 0.07  | 0.68  |
| 19                    | M      | 18.2          | <i>Giardia lamblia</i>                                      | A          | No    | -0.27 | 0.01  |
| 20                    | F      | 35.6          | Negative                                                    |            | -1.47 | -0.39 | 0.65  |
| 21                    | M      | 30.4          | Negative                                                    |            | -0.62 | -0.51 | -0.18 |
| 22                    | F      | 51.8          | Negative                                                    |            | 0.68  | -0.16 | -0.79 |
| 23                    | F      | 41.1          | Negative                                                    |            | -0.20 | 0.22  | 0.52  |
| 24                    | F      | 54.1          | Negative                                                    |            | -0.49 | -0.12 | 0.40  |
| 25                    | F      | 28.0          | <i>Giardia lamblia</i>                                      | E          | -1.20 | -0.13 | 0.88  |
| 26                    | M      | 45.2          | Negative                                                    |            | -1.13 | 0.66  | 0.66  |
| 27                    | M      | 22.0          | <i>Giardia lamblia</i>                                      | A          | No    | -2.20 | -0.63 |
| 28                    | F      | 37.3          | Negative                                                    |            | -0.17 | 0.91  | 1.41  |
| 29                    | F      | 38.6          | Negative                                                    |            | -0.10 | 0.37  | 0.63  |
| 30                    | M      | 45.7          | <i>Endolimax nana</i>                                       |            | 0.27  | 0.29  | 0.12  |
| 31                    | M      | 30.9          | <i>Giardia lamblia</i>                                      | A          | -1.83 | 2.88  | 5.04  |
| 32                    | F      | 30.9          | <i>Giardia lamblia</i>                                      | E          | -1.76 | -1.36 | -0.34 |
| 33                    | F      | 25.3          | <i>Giardia lamblia</i>                                      | A          | 0.26  | 0.22  | 0.25  |
| 34                    | M      | 34.5          | <i>Giardia lamblia</i>                                      | A          | -0.81 | 0.39  | 1.16  |
| 35                    | M      | 26.4          | <i>Giardia lamblia</i>                                      | A          | -1.79 | -2.32 | -1.54 |
| 36                    | F      | 50.8          | <i>Endolimax nana</i>                                       |            | 0.47  | 0.31  | 0.18  |
| 37                    | F      | 22.6          | <i>Giardia lamblia</i>                                      | E          | No    | -0.11 | 0.31  |
| 38                    | F      | 43.2          | <i>Giardia lamblia</i>                                      | E          | -1.97 | -2.72 | -2.07 |
| 39                    | F      | 31.7          | <i>Giardia lamblia</i>                                      | E          | -1.90 | -0.50 | 0.88  |
| 40                    | F      | 23.9          | <i>Giardia lamblia</i>                                      | A          | No    | 0.69  | 0.68  |
| 41                    | F      | 41.7          | <i>Giardia lamblia</i>                                      | A          | -1.79 | -1.90 | -1.11 |
| 42                    | M      | 40.2          | <i>Giardia lamblia</i>                                      | E          | -0.93 | 0.25  | 1.04  |
| 43                    | F      | 36.1          | <i>Giardia lamblia</i>                                      | A          | -1.02 | -1.38 | -1.15 |
| 44                    | F      | 45.4          | <i>Giardia lamblia</i>                                      | A          | 1.09  | 1.20  | 0.93  |

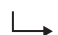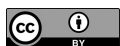

| Sample identification | Gender | Age in months | Diagnosis                                                                                  | Assemblage | HAZ   | WAZ   | WHZ   |
|-----------------------|--------|---------------|--------------------------------------------------------------------------------------------|------------|-------|-------|-------|
| 45                    | M      | 54.3          | <i>Ascaris lumbricoides</i><br><i>Entamoeba histolytica/dispar/moshkovskii/bangladeshi</i> |            | -0.62 | 0.03  | 0.62  |
| 46                    | F      | 30.1          | <i>Giardia lamblia</i>                                                                     | A          | -1.08 | -0.35 | 0.43  |
| 47                    | F      | 63.7          | <i>Endolimax nana</i>                                                                      |            | -1.45 | -0.83 | 0.27  |
| 48                    | F      | 33.6          | <i>Ascaris lumbricoides</i>                                                                |            | -0.12 | 0.81  | 1.20  |
| 49                    | F      | 36.8          | <i>Ascaris lumbricoides</i><br><i>Endolimax nana</i>                                       |            | -0.10 | 0.56  | 0.87  |
| 50                    | M      | 22.5          | Negative                                                                                   |            | 1.67  | 2.15  | 1.57  |
| 51                    | M      | 49.7          | <i>Giardia lamblia</i>                                                                     | A          | -2.16 | -0.60 | 1.04  |
| 52                    | F      | 33.6          | <i>Giardia lamblia</i>                                                                     | E          | -1.43 | -1.77 | -1.27 |
| 53                    | M      | 38.5          | <i>Giardia lamblia</i>                                                                     | A          | 0.12  | 0.73  | 0.87  |
| 54                    | M      | 31.0          | <i>Giardia lamblia</i>                                                                     | A          | -1.85 | 2.28  | 4.35  |
| 55                    | F      | 51.7          | <i>Giardia lamblia</i>                                                                     | A          | 0.26  | 0.64  | 0.83  |
| 56                    | F      | 21.3          | <i>Giardia lamblia</i>                                                                     | A/E        | No    | 1.13  | 0.82  |
| 57                    | F      | 58.9          | <i>Giardia lamblia</i>                                                                     | A          | -1.54 | -1.67 | -0.85 |
| 58                    | F      | 25.9          | Negative                                                                                   |            | -0.18 | -1.17 | -1.33 |
| 59                    | F      | 44.7          | Negative                                                                                   |            | -0.29 | 0.19  | 0.55  |
| 60                    | M      | 64.5          | <i>Giardia lamblia</i><br><i>Ascaris lumbricoides</i>                                      | A          | -1.31 | -0.75 | 0.29  |
| 61                    | M      | 29.2          | <i>Giardia lamblia</i>                                                                     | A          | -3.82 | -3.07 | -0.70 |
| 62                    | M      | 51.5          | <i>Giardia lamblia</i>                                                                     | A          | -1.89 | -0.35 | 1.18  |
| 63                    | M      | 50.5          | Negative                                                                                   |            | -0.15 | 0.42  | 0.72  |
| 64                    | F      | 25.4          | Negative                                                                                   |            | -0.21 | -1.12 | -1.20 |
| 65                    | F      | 38.0          | <i>Ascaris lumbricoides</i><br><i>Entamoeba histolytica/dispar/moshkovskii/bangladeshi</i> |            |       |       |       |
| 66                    | F      | 21.1          | Negative                                                                                   |            | No    | -2.27 | -1.41 |
| 67                    | F      | 47.5          | Negative                                                                                   |            | -0.81 | -0.73 | -0.27 |
| 68                    | F      | 25.3          | Negative                                                                                   |            | 0.44  | 1.82  | 2.29  |
| 69                    | M      | 30.1          | <i>Giardia lamblia</i>                                                                     | E          | -1.94 | -1.51 | -0.41 |
| 70                    | M      | 50.6          | Negative                                                                                   |            | -0.16 | 0.61  | 1.00  |
| 71                    | M      | 22.7          | Negative                                                                                   |            | No    | 0.55  | 0.93  |
| 72                    | M      | 33.2          | <i>Ascaris lumbricoides</i><br><i>Giardia lamblia</i>                                      | A          | -1.69 | -0.64 | 0.47  |
| 73                    | F      | 40.4          | <i>Giardia lamblia</i>                                                                     | E          | -2.38 | -1.80 | -0.42 |
| 74                    | F      | 28.8          | <i>Giardia lamblia</i>                                                                     | A          | 0.26  | -1.27 | -2.07 |
| 75                    | F      | 21.9          | Negative                                                                                   |            | No    | 1.03  | 1.45  |
| 76                    | F      | 29.5          | <i>Giardia lamblia</i>                                                                     | E          | -0.97 | 0.76  | 1.84  |
| 77                    | F      | 40.1          | <i>Giardia lamblia</i>                                                                     | A          | -0.31 | -0.83 | -0.98 |
| 78                    | F      | 18.7          | Negative                                                                                   |            | No    | -0.94 | -1.36 |
| 79                    | F      | 45.9          | <i>Giardia lamblia</i>                                                                     | E          | -0.60 | -0.47 | -0.09 |
| 80                    | M      | 25.8          | <i>Giardia lamblia</i>                                                                     | A          | -1.08 | -0.30 | 0.68  |
| 81                    | F      | 47.4          | Negative                                                                                   |            | 1.26  | 0.24  | -0.70 |
| 82                    | F      | 21.3          | <i>Giardia lamblia</i>                                                                     | A          | No    | 0.08  | -2.54 |
| 83                    | M      | 35.5          | Negative                                                                                   |            | 0.35  | 1.13  | 1.25  |
| 84                    | M      | 39.5          | Negative                                                                                   |            | 0.70  | 1.63  | 1.64  |
| 85                    | F      | 31.0          | <i>Giardia lamblia</i>                                                                     | A/E        | -1.78 | -0.44 | 0.88  |
| 86                    | F      | 40.8          | <i>Giardia lamblia</i>                                                                     | A          | -1.41 | -1.76 | -1.31 |
| 87                    | F      | 42.1          | <i>Giardia lamblia</i>                                                                     | E          | -2.35 | -2.14 | -0.89 |

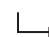

| Sample identification | Gender | Age in months | Diagnosis                                                                      | Assemblage | HAZ   | WAZ   | WHZ   |
|-----------------------|--------|---------------|--------------------------------------------------------------------------------|------------|-------|-------|-------|
| 88                    | F      | 42.8          | <i>Ascaris lumbricoides</i>                                                    |            | -2.69 | -0.57 | 1.48  |
| 89                    | M      | 26.9          | <i>Giardia lamblia</i>                                                         | E          | -1.88 | -1.52 | -0.34 |
| 90                    | M      | 23.9          | <i>Endolimax nana</i>                                                          |            | No    | -0.71 | -0.89 |
| 92                    | M      | 48.9          | Negative                                                                       |            | -0.17 | 0.12  | 0.12  |
| 93                    | F      | 34.1          | <i>Giardia lamblia</i>                                                         | B          | -0.98 | -0.04 | 0.72  |
| 94                    | F      | 28.1          | <i>Giardia lamblia</i><br><i>Ascaris lumbricoides</i>                          | A          |       |       |       |
| 96                    | F      | 23.7          | Negative                                                                       |            | No    | 2.02  | 2.29  |
| 98                    | F      | 34.9          | Negative                                                                       |            | -1.10 | -0.09 | 0.75  |
| 99                    | F      | 25.0          | <i>Giardia lamblia</i>                                                         | E          |       |       |       |
| 100                   | F      | 29.6          | <i>Giardia lamblia</i>                                                         | B          |       |       |       |
| 101                   | F      | 32.7          | <i>Giardia lamblia</i>                                                         | B          |       |       |       |
| 102                   | F      | 54.2          | Negative                                                                       |            | -0.50 | -0.13 | 0.40  |
| 103                   | F      | 36.7          | <i>Giardia lamblia</i>                                                         | E          | -0.34 | 1.64  | 2.49  |
| 104                   | F      | 34.0          | <i>Giardia lamblia</i>                                                         | B          | -1.22 | No    | No    |
| 105                   | F      | 23.0          | Negative                                                                       |            | No    | 0.89  | 1.88  |
| 106                   | F      | 32.3          | Negative                                                                       |            |       |       |       |
| 107                   | M      | 34.4          | <i>Giardia lamblia</i>                                                         | B          | -1.62 | -0.47 | 0.63  |
| 108                   | M      | 38.4          | Negative                                                                       |            | 0.88  | 1.68  | 1.57  |
| 109                   | F      | 30.7          | Negative                                                                       |            | -1.45 | -0.19 | 0.94  |
| 110                   | F      | 52.8          | <i>Entamoeba coli</i>                                                          |            | -1.24 | 0.55  | 1.83  |
| 111                   | M      | 46.1          | <i>Giardia lamblia</i>                                                         | B          | -1.48 | -0.57 | 0.42  |
| 112                   | F      | 27.3          | <i>Giardia lamblia</i><br><i>Entamoeba coli</i><br><i>Ascaris lumbricoides</i> | A          | -0.22 | 0.31  | 0.68  |
| 114                   | M      | 27.3          | Negative                                                                       |            |       |       |       |
| 116                   | M      | 52.9          | Negative                                                                       |            | -0.22 | 0.89  | 1.45  |
| 117                   | M      | 30.8          | Negative                                                                       |            | 0.11  | 0.21  | 0.21  |
| 118                   | M      | 20.2          | <i>Giardia lamblia</i>                                                         | A          | No    | -0.53 | 0.01  |
| 119                   | M      | 34.3          | <i>Entamoeba coli</i><br><i>Ascaris lumbricoides</i>                           |            | -2.17 | -2.21 | -1.30 |
| 120                   | M      | 39.7          | Negative                                                                       |            | -1.11 | 0.02  | 0.87  |
| 121                   | M      | 41.3          | Negative                                                                       |            |       |       |       |
| 122                   | M      | 52.5          | <i>Giardia lamblia</i>                                                         | B          | -1.55 | -0.12 | 1.21  |
| 124                   | F      | 38.1          | Negative                                                                       |            | -0.29 | 0.84  | 1.41  |
| 125                   | F      | 29.0          | <i>Giardia lamblia</i>                                                         | E          | -1.40 | -0.23 | 0.88  |
| 126                   | M      | 21.1          | Negative                                                                       |            |       |       |       |
| 127                   | F      | 20.2          | <i>Giardia lamblia</i>                                                         | A          | No    | -2.62 | -1.72 |
| 128                   | M      | 30.2          | <i>Ascaris lumbricoides</i>                                                    |            | -1.97 | 0.32  | 2.04  |
| 129                   | F      | 47.6          | <i>Giardia lamblia</i>                                                         | B          |       |       |       |
| 130                   | F      | 45.7          | Negative                                                                       |            |       |       |       |
| 131                   | M      | 42.4          | <i>Giardia lamblia</i>                                                         | B          |       |       |       |
| 133                   | F      | 35.4          | Negative                                                                       |            | -2.76 | -1.25 | 0.62  |
| 134                   | F      | 32.7          | Negative                                                                       |            | -1.81 | -0.37 | 0.96  |
| 135                   | M      | 35.9          | Negative                                                                       |            | -2.17 | -1.39 | -0.21 |
| 136                   | F      | 28.4          | <i>Giardia lamblia</i><br><i>Entamoeba coli</i>                                | A          |       |       |       |

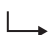

| Sample identification | Gender | Age in months | Diagnosis                                                                                                           | Assemblage | HAZ   | WAZ   | WHZ   |
|-----------------------|--------|---------------|---------------------------------------------------------------------------------------------------------------------|------------|-------|-------|-------|
| 137                   | M      | 30.5          | Negative                                                                                                            |            | -0.36 | 0.51  | 1.04  |
| 138                   | M      | 34.0          | <i>Giardia lamblia</i>                                                                                              | A          | 1.35  | 1.74  | 1.29  |
| 139                   | F      | 44.0          | Negative                                                                                                            |            | -0.12 | 0.17  | 0.42  |
| 141                   | F      | 50.6          | Negative                                                                                                            |            |       |       |       |
| 143                   | M      | 46.7          | Negative                                                                                                            |            | -0.60 | 0.65  | 1.37  |
| 144                   | M      | 27.1          | Negative                                                                                                            |            | 1.93  | 0.73  | -0.43 |
| 145                   | F      | 42.9          | Negative                                                                                                            |            | -0.69 | -0.63 | -0.29 |
| 146                   | M      | 43.7          | <i>Endolimax nana</i><br><i>Ascaris lumbricoides</i><br><i>Entamoeba histolytica/díspar/moshkovskii/bangladeshi</i> |            | -1.93 | -0.35 | 1.07  |
| 147                   | M      | 38.4          | <i>Giardia lamblia</i>                                                                                              | A          | -1.45 | 0.05  | 1.18  |
| 148                   | M      | 27.9          | Negative                                                                                                            |            |       |       |       |
| 149                   | F      | 32.3          | <i>Giardia lamblia</i>                                                                                              | A          | -1.47 | 0.49  | 1.84  |
| 151                   | F      | 39.3          | Negative                                                                                                            |            | -0.20 | 0.31  | 0.63  |
| 152                   | F      | 35.9          | <i>Giardia lamblia</i>                                                                                              | B          | -0.23 | -0.13 | -0.04 |
| 153                   | F      | 53.8          | <i>Giardia lamblia</i><br><i>Endolimax nana</i>                                                                     | A          | -0.01 | 0.56  | 0.93  |
| 154                   | F      | 34.6          | <i>Giardia lamblia</i><br><i>Ascaris lumbricoides</i>                                                               | A          | -1.58 | -1.24 | -0.42 |
| 155                   | M      | 52.2          | Negative                                                                                                            |            | -0.14 | 0.51  | 0.86  |
| 156                   | M      | 21.0          | Negative                                                                                                            |            |       |       |       |
| 157                   | F      | 48.1          | Negative                                                                                                            |            | -0.89 | -0.79 | -0.27 |
| 159                   | M      | 20.8          | <i>Giardia lamblia</i>                                                                                              | E          |       |       |       |
| 160                   | M      | 38.3          | Negative                                                                                                            |            | -0.62 | 0.17  | 0.68  |
| 161                   | M      | 31.7          | Negative                                                                                                            |            | -1.97 | -1.02 | 0.23  |
| 162                   | F      | 20.7          | Negative                                                                                                            |            | No    | -1.18 | -1.37 |
| 163                   | F      | 36.9          | Negative                                                                                                            |            | -1.65 | -0.58 | 0.56  |
| 164                   | F      | 37.2          | <i>Giardia lamblia</i>                                                                                              | E          | 0.10  | 1.55  | 2.03  |
| 166                   | F      | 21.9          | <i>Giardia lamblia</i><br><i>Endolimax nana</i>                                                                     | A          | No    | -1.32 | -0.36 |
| 167                   | F      | 48.8          | Negative                                                                                                            |            |       |       |       |
| 169                   | M      | 21.8          | <i>Giardia lamblia</i>                                                                                              | B          | No    | -2.18 | -0.63 |
| 170                   | F      | 45.6          | Negative                                                                                                            |            |       |       |       |
| 171                   | F      | 27.2          | Negative                                                                                                            |            | -0.47 | -1.41 | -1.46 |
| 173                   | M      | 21.6          | Negative                                                                                                            |            | No    | -0.01 | 0.72  |
| 174                   | M      | 28.2          | <i>Giardia lamblia</i>                                                                                              | A/E        |       |       |       |
| 175                   | F      | 33.3          | <i>Giardia lamblia</i>                                                                                              | B          |       |       |       |
| 176                   | F      | 27.7          | Negative                                                                                                            |            | -0.04 | -0.08 | -0.01 |
| 177                   | M      | 22.4          | <i>Endolimax nana</i>                                                                                               |            | No    | -0.01 | 0.12  |
| 178                   | F      | 37.9          | <i>Giardia lamblia</i>                                                                                              | B          |       |       |       |
| 180                   | F      | 20.2          | <i>Giardia lamblia</i>                                                                                              | A          | No    | -0.77 | 0.01  |
| 181                   | M      | 41.8          | Negative                                                                                                            |            | -0.64 | 0.10  | 0.60  |
| 182                   | M      | 41.2          | <i>Endolimax nana</i>                                                                                               |            | -1.07 | 0.79  | 1.90  |
| 183                   | F      | 37.4          | <i>Endolimax nana</i>                                                                                               |            | -0.19 | -0.12 | -0.03 |
| 185                   | F      | 50.0          | <i>Giardia lamblia</i>                                                                                              | B          | -0.37 | 0.34  | 0.80  |
| 186                   | F      | 37.3          | Negative                                                                                                            |            | -2.50 | -2.42 | -1.12 |
| 187                   | M      | 27.9          | <i>Giardia lamblia</i><br><i>Endolimax nana</i>                                                                     | B          | -1.24 | -1.44 | -0.86 |

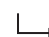

| Sample identification | Gender | Age in months | Diagnosis                                       | Assemblage | HAZ   | WAZ   | WHZ   |
|-----------------------|--------|---------------|-------------------------------------------------|------------|-------|-------|-------|
| 188                   | M      | 42.6          | Negative                                        |            |       |       |       |
| 189                   | M      | 24.6          | Negative                                        |            | -0.66 | -0.17 | 0.56  |
| 190                   | M      | 42.0          | <i>Giardia lamblia</i>                          | B          | -1.19 | 0.09  | 1.04  |
| 191                   | M      | 34.7          | <i>Giardia lamblia</i>                          | B          | -2.53 | -1.15 | 0.44  |
| 192                   | F      | 25.4          | Negative                                        |            | -0.20 | -1.11 | -1.20 |
| 193                   | M      | 45.2          | Negative                                        |            | -1.38 | -0.43 | 0.50  |
| 195                   | F      | 33.9          | Negative                                        |            | -2.54 | -0.22 | 1.75  |
| 196                   | F      | 21.7          | Negative                                        |            | No    | -0.94 | -0.18 |
| 198                   | F      | 27.9          | <i>Giardia lamblia</i>                          | A/E        | -1.44 | -0.61 | 0.46  |
| 199                   | M      | 29.2          | Negative                                        |            | -0.38 | -0.41 | -0.20 |
| 200                   | M      | 35.2          | <i>Giardia lamblia</i>                          | B          | 0.64  | 1.02  | 0.87  |
| 201                   | F      | 34.5          | <i>Giardia lamblia</i>                          | B          |       |       |       |
| 202                   | M      | 37.7          | Negative                                        |            | -0.54 | -0.45 | -0.28 |
| 203                   | F      | 33.3          | <i>Giardia lamblia</i>                          | B          |       |       |       |
| 204                   | F      | 27.9          | <i>Giardia lamblia</i>                          | B          | -0.90 | -0.14 | 0.62  |
| 206                   | F      | 37.5          | <i>Entamoeba coli</i>                           |            | -1.22 | -0.72 | 0.00  |
| 207                   | M      | 32.2          | Negative                                        |            | -0.95 | -0.68 | -0.18 |
| 208                   | F      | 52.8          | Negative                                        |            | -0.78 | 1.30  | 2.33  |
| 209                   | F      | 43.0          | Negative                                        |            | -0.46 | 0.05  | 0.52  |
| 211                   | M      | 20.6          | <i>Giardia lamblia</i><br><i>Endolimax nana</i> | A          | No    | 1.02  | 1.04  |
| 212                   | M      | 38.9          | <i>Giardia lamblia</i>                          | A          |       |       |       |
| 213                   | F      | 33.9          | Negative                                        |            | -1.59 | -0.37 | 0.82  |
| 214                   | F      | 21.7          | Negative                                        |            | 2.48  | 0.97  | -0.37 |

Hatched areas mean data not obtained. F: female; HAZ: height-for-age; M: male; No: value not obtained by the software; WAZ: weight-for-age; WHZ: weight-for-height.
